1

2 **The IMMUNE-ASSOCIATED NUCLEOTIDE-BINDING 9 protein is a regulator of**  
3 **basal immunity in *Arabidopsis thaliana***

4

5 Yuanzheng Wang<sup>1,2</sup>, Tabata Rosas-Diaz<sup>1</sup>, Carlos Caceres-Moreno<sup>1,2</sup>, Rosa Lozano-  
6 Duran<sup>1</sup> and Alberto P. Macho<sup>1,\*</sup>.

7

8 <sup>1</sup>Shanghai Center for Plant Stress Biology, CAS Center for Excellence in Molecular  
9 Plant Sciences; Shanghai Institutes of Biological Sciences, Chinese Academy of  
10 Sciences, Shanghai 201602, China.

11 <sup>2</sup>University of Chinese Academy of Sciences, Beijing, China.

12

13 Running title: IAN9 is a regulator of plant basal immunity

14

15 Highlight: IAN9 and its interactor IAP1 act as negative regulators of basal immunity  
16 against bacterial pathogens in *Arabidopsis thaliana*.

17

18 \* Corresponding author: Alberto P. Macho,

19 [alberto.macho@sibs.ac.cn](mailto:alberto.macho@sibs.ac.cn); (+86) 02157078280

20

21 Submission date: March 6<sup>th</sup> 2018

22

23 Word count: 5956

24

25 Figures: 6 (2 in colour in print)

26 Supporting figures: 19

27 Supporting tables: 3

28

29

30 **Abstract**

31

32 A robust regulation of plant immune responses requires multitude of positive and  
33 negative regulators that act in concert. The immune-associated nucleotide-binding  
34 (IAN) gene family members are associated with immunity in different organisms,  
35 although no characterization of their function has been carried out to date in plants.  
36 In this work, we analyzed the expression patterns of *IAN* genes and found that *IAN9*  
37 is repressed upon pathogen infection or treatment with immune elicitors. *IAN9*  
38 encodes a plasma membrane-localized protein that genetically behaves as a  
39 negative regulator of immunity. A novel *ian9* mutant generated by CRISPR/Cas9  
40 shows increased resistance to *Pseudomonas syringae*, while transgenic plants  
41 overexpressing *IAN9* show a slight increase in susceptibility. *In vivo*  
42 immunoprecipitation of IAN9-GFP followed by mass spectrometry analysis revealed  
43 that IAN9 associates with a previously uncharacterized C3HC4-type RING finger  
44 domain-containing protein that we named IAP1, for IAN9-associated protein 1, which  
45 also acts as a negative regulator of basal immunity. Interestingly, neither *ian9* or *iap1*  
46 mutant plants show any obvious developmental phenotype, suggesting that they  
47 display enhanced inducible immunity rather than constitutive immune responses.  
48 Since both *IAN9* and *IAP1* have orthologs in important crop species, they could be  
49 suitable targets to generate plants more resistant to diseases caused by bacterial  
50 pathogens without yield penalty.

51

52 Keywords: Arabidopsis, CRISPR/Cas9, IAN, plant disease, plant immunity, negative  
53 regulation, protein complex, *Pseudomonas syringae*.

54

55 **Introduction**

56

57 The plant immune system comprises an intricate network of receptors and regulators  
58 aimed at keeping the cellular homeostasis in the absence of pathogen threat and  
59 responding rapidly to biotic stimuli in order to prevent infection. Plants have evolved  
60 to perceive pathogen-derived molecules that constitute signals of a potential  
61 invasion, also called invasion patterns (Cook et al, 2015). Conserved microbial  
62 molecules constitute good targets for recognition by plants; some of these molecules  
63 have been shown to be perceived by plant cells as pathogen-associated molecular  
64 patterns (PAMPs; Boller and Felix, 2009). PAMPs are perceived at the cell surface  
65 by transmembrane pattern-recognition receptors (PRRs; Zipfel, 2014). PRRs act in  
66 coordination with several regulators and additional proteins that mediate signal  
67 transduction (Couto and Zipfel, 2016), including mitogen-activated protein kinases  
68 (MAPKs), calcium-dependent protein kinases (CDPKs), receptor-like cytoplasmic  
69 kinases (RLCKs), and respiratory burst oxidase homologs (RBOHs) (Macho and  
70 Zipfel, 2014; Bigeard et al, 2015). Downstream responses include the production of  
71 the phytohormone salicylic acid and antimicrobial compounds, the deposition of  
72 callose at the cell wall, and extensive transcriptional reprogramming (Boller and  
73 Felix, 2009). The activation of immunity is aimed at preventing the proliferation of the  
74 perceived pathogen, and prepares plant cells to mount an efficient defence response  
75 against subsequent biotic threats. However, defence is costly, in terms of energy  
76 investment and the concomitant disruption to the normal developmental program  
77 (Huot et al, 2014; Stael et al, 2015), and as such needs to be tightly regulated. For  
78 this reason, immune responses are inducible, and negative regulators ensure a firm  
79 control of their activated state. On the other hand, it has been demonstrated that  
80 activation of defence and inhibition of growth can be uncoupled, so that active  
81 defence and growth can occur simultaneously, indicating that developmental  
82 alterations are the consequence of an active process, and not necessarily of limiting  
83 resources (De Wit et al, 2013; Campos et al, 2016; Scheres and van der Putten,  
84 2017).

85

86 Pathogens have developed strategies to manipulate plant cells in order to proliferate  
87 inside plant tissues. These include the suppression of plant immunity, the alteration  
88 of the physical environment, and the acquisition of nutrients to support pathogenic  
89 lifestyle (Win et al, 2012). In Gram-negative bacterial pathogens, the most important  
90 virulence factor is the type-III secretion system (T3SS), which injects effector proteins  
91 directly inside plant cells (type-III-secreted effectors, T3Es). The manipulation of

92 plant cellular functions by T3Es is essential for bacteria to proliferate and is required  
93 for the development of disease (Macho and Zipfel, 2015; Macho, 2016). However,  
94 some plants have evolved intracellular receptors that can perceive T3E activities as  
95 an indication of pathogen invasion, hence becoming resistant to bacterial infection.  
96 These receptors contain nucleotide-binding and leucine-rich repeat domains (NLRs;  
97 Khan et al, 2016). NLR activation contributes to the development of defence  
98 responses similar to those established after PRR activation, but are often more  
99 intense, and sometimes lead to local cell death, which prevents further pathogen  
100 proliferation and spread (Chiang and Coaker, 2015). Both PRRs and NLRs constitute  
101 the basis of plant innate immunity, and are the major determinants of basal immunity  
102 in plants.

103

104 Guanosine triphosphate (GTP)-binding proteins are regulators of various biological  
105 processes in eukaryotic cells, such as such as signal transduction, cell proliferation,  
106 cytoskeletal organization, and intracellular membrane trafficking, and are classified  
107 into numerous families (Takai et al, 2001; Vernoud et al, 2003). IMMUNE-  
108 ASSOCIATED NUCLEOTIDE-BINDING/GTPases OF IMMUNITY-ASSOCIATED  
109 PROTEINS (IAN/GIMAP) proteins comprise a sub-family of GTPase-like proteins  
110 that has been found in anthozoans, vertebrates, and angiosperm plants (Nitta and  
111 Takahama, 2007; Weiss et al, 2013). In vertebrates, proteins from the IAN/GIMAP  
112 family regulate the development and homeostasis of T cells and are associated to  
113 autoimmunity (Nitta and Takahama, 2007). The transcriptional regulation of genes  
114 encoding IAN/GIMAP proteins has been linked to immunity in different organisms: in  
115 mice, *IAN/GIMAP* genes are mostly expressed in immune tissues (Nitta et al, 2006),  
116 and they have also been reported as induced in corals after treatment with the  
117 bacterial immune elicitor MDP (Weiss et al, 2013). In Arabidopsis, IAN/GIMAP  
118 proteins are defined by the presence of an *avrRpt2*-induced gene 1 (*AIG1*) domain,  
119 and contain conserved GTP-binding domains, including a P-loop motif known to bind  
120 GTP/GDP in Ras GTPases (Bourne et al, 1991), and coiled-coil motifs (Liu et al,  
121 2008). Originally, *AtAIG1* (also known as *IAN8*) was defined as a gene  
122 overexpressed in response to the avirulent bacterial strain *Pseudomonas syringae*  
123 *pv. maculicola* (*Pma*) expressing the effector *AvrRpt2* (Reuber and Ausubel, 1996).  
124 Additionally, computational analysis of transcriptomic data has revealed that the  
125 transcription of other *IAN* family members responds to different biotic stimuli:  
126 nematode infection induces the expression of *IAN3* and *IAN11*, while the  
127 transcription of *IAN11*, *IAN12* and *IAN13* is reduced by infection with *Myzus persicae*  
128 (Liu et al, 2008).

129

130 Despite the accumulating evidences that associate *IAN* genes with immunity in  
131 plants, no characterization of their function in this process has been carried out to  
132 date. Here, we analyzed the expression patterns of *IAN* genes and found that the  
133 expression of *IAN9* is repressed upon pathogen infection or treatment with immune  
134 elicitors. Further characterization indicated that *IAN9* encodes a plasma membrane-  
135 localized protein and that it genetically behaves as a negative regulator of immunity.  
136 *In vivo* immunoprecipitation of IAN9-GFP followed by mass spectrometry analysis  
137 revealed that IAN9 associates with a C3HC4-type RING finger domain-containing  
138 protein that we named IAP1, for IAN9-associated protein 1. Interestingly, our results  
139 show that IAP1, like IAN9, negatively regulates immunity, raising the idea that these  
140 two proteins may work together in the control of immune responses.

141

## 142 **Materials and Methods**

143

### 144 **Plant materials and growth conditions**

145 Arabidopsis seeds were sterilized with bleach solution (20% bleach and 0.1% Triton  
146 X-100) for 2-3 minutes, then washed with sterile water 4-5 times and sown on solid ½  
147 MS medium (2.21 g Murashige & Skoog Basal Medium with Vitamins, 15 g Sucrose,  
148 7 g Agar. 1 L). After stratification at 4°C for 3 days, the plates were transferred to a  
149 growth chamber (22°C, 16 h light/8 h dark) for germination and growth. For  
150 experiments involving mature Arabidopsis plants, sterile seeds were firstly stratified  
151 at 4°C for 3 days, then transferred to soil. Plants for bacterial infection assays were  
152 cultivated in a short day chamber (22°C, 8 h light/16 h dark photoperiod, 65%  
153 humidity). Plants for *Agrobacterium* transformation were grown in a long day growth  
154 room (22°C, 16 h light/8 h dark photoperiod).

155

### 156 **Bacterial infections**

157 *Pseudomonas syringae* pv *tomato* DC3000 (*Pst* DC3000) and DC3000 (AvrRpt2)  
158 were streaked on selective ½ salt LB plates (10 g Tryptone, 5 g Yeast Extract, 5 g  
159 NaCl, 15 g Agar per 1 L) and cultivated at 22°C for 2 days. For *Pst* DC3000, bacteria  
160 were collected from the plates into sterile water, the OD was adjusted to a value of  
161 0.1 ( $5 \times 10^7$  cfu/ml) or 0.2 ( $10^8$  cfu/ml), and silwet-L77 was added to a final  
162 concentration of 0.03% before performing spray inoculation onto 3-4 week-old soil-  
163 grown Arabidopsis under short day conditions. The plants were then covered with  
164 cling wrap for 3 hours. The whole plants were harvested in 1.5 ml microcentrifuge  
165 tubes and weighed. For *Pst* DC3000 (AvrRpt2), the OD was adjusted to 0.1 ( $5 \times 10^7$   
166 cfu/ml) or 0.001 ( $10^5$  cfu/ml). The bacterial suspension was pressure-infiltrated into 5-  
167 6 week-old short day-grown Arabidopsis leaves with a needleless syringe (3 leaves  
168 per plant), and leaf discs were collected into 1.5 ml tubes using a leaf punch at 3  
169 days post-inoculation. In both cases, plant tissues were ground and homogenized in  
170 sterile water before plating serial dilutions on selective ½ salt LB agar plates. The  
171 plates were placed at 28°C for 1.5 days and the bacterial growth was calculated as  
172 colony-forming units.

173

### 174 **Treatments with immune elicitors**

175 Sterile seeds were sown on ½ solid MS medium to germinate and grown for 3-4 days  
176 in long day conditions. Seedlings were then transferred into ½ liquid MS medium in  
177 12-well culture plates (Thermo Fisher Scientific, Waltham, MA, US), and grown for  
178 another 6-7 days. Every well contained 3 seedlings, and every experiment included 3

179 independent samples from 3 independent wells. The flg22 peptide or salicylic acid  
180 were added into the liquid medium to a final concentration of 100 nM and 0.5 mM,  
181 respectively. All the plates were incubated on a shaker for 5-10 minutes following  
182 addition of the elicitor. Samples were harvested into 1.5 ml tubes at different time  
183 points after treatment, as indicated in the figures.

184

#### 185 **Root growth assay**

186 Sterile seeds were sown on ½ solid MS medium and stratified at 4°C for 3 days.  
187 Then the plates were placed into a growth chamber for 1 day. The germinated  
188 seedlings were transferred to the new ½ solid MS medium (square plates). Square  
189 plates were placed vertically into a growth chamber and root length was measured 5  
190 days later.

191

#### 192 **RNA isolation, RT-PCR, and RT-qPCR**

193 For RNA extraction, plant tissues were collected in 1.5 ml microfuge tubes with one  
194 metal bead and the tubes were immediately placed into liquid nitrogen. Samples  
195 were ground thoroughly with a TissueLyser (QIAGEN, Duesseldorf, Nordrhein-  
196 Westfalen, Germany) for 1 minute, and placed back in liquid nitrogen. Total RNA was  
197 extracted with the E.Z.N.A. Plant RNA kit (Omega Bio-Tek, Norcross, GA, US) with  
198 in-column DNA digestion and an additional sample treatment with DNAase (Omega  
199 Bio-Tek, Norcross, GA, US). First-strand cDNA was synthesized using the iScript  
200 cDNA synthesis kit (Bio-Rad, Hercules, CA, US) with a volume of 20 µl. For RT-PCR,  
201 the PCR reaction was performed in 50 µl using the Q5 Hot Start High-Fidelity DNA  
202 polymerase (New England Biolabs, Ipswich, MA, US) with 35 or 38 cycles. For  
203 quantitative RT-PCR (RT-qPCR) , PCR reactions were performed in 20 µl using the  
204 iTaq Universal SYBR Green Supermix kit (Bio-Rad, Hercules, CA, US) in the  
205 StepOnePlus Real-Time PCR System (Applied Biosystems, Foster City, CA, US).  
206 Data were analyzed with Excel and GraphPad Prism 6.

207

#### 208 **Confocal microscopy imaging**

209 Cotyledons from 3-4 day-old long day-grown Arabidopsis seedlings were imaged  
210 using a Confocal Laser Scanning Microscope (CLSW) Platform: Leica TCS SP8  
211 (Leica, Mannheim, Germany). The GFP was excited with an argon laser at 488 nm,  
212 and its emission was detected at 500-550 nm. For plasmolysis assays, cotyledons  
213 were placed into a 1 M NaCl solution on glass slides, and GFP was observed and  
214 recorded after 5-10 minutes. For FM4-64 staining, cotyledons from 4 day-old  
215 seedlings were cut and soaked into 5 ng/µl FM4-64 solution as described previously

216 (Beck et al., 2012) for 5 minutes; samples were then transferred to water on glass  
217 slides and covered with coverslips. For dual channel simultaneous observation, the  
218 fluorescence signal of FM4-64 was excited with an argon laser at 561 nm and its  
219 emission was observed at 580-650 nm; the GFP was excited at 488 nm and  
220 observed at 500-550 nm. For co-localization assays, 3 week-old *N. benthamiana*  
221 leaves were co-infiltrated with *Agrobacterium* GV3101 carrying plasmids to express  
222 *RFP-IAN9* and *GFP-IAP1*. Leaves were co-infiltrated with the GV3101 strain carrying  
223 plasmids to express *RFP-IAN9* and *GFP* as control. Three-mm leaf discs were  
224 punched from the whole leaf 24 hours post infiltration and transferred to water on  
225 glass slides. For dual channel image acquisition, GFP and RFP were excited at 488  
226 nm and 561nm respectively; emission was collected at 500-550 nm for GFP and  
227 580-650nm for RFP.

228

### 229 **MAPK activation and western blot assays**

230 For protein extraction, Arabidopsis seedlings or leaf discs from *N. benthamiana* were  
231 ground with a Tissue Lyser (QIAGEN, Hilden, Nordrhein-Westfalen, Germany).  
232 Samples were then re-suspended in lysis buffer [2x loading buffer: 100 mM Tris-HCl  
233 (pH 6.8), 10% Glycerol, 2% SDS, 0.03% bromophenol blue], boiled at 95°C for 10  
234 minutes, and centrifuged at 14,000 g for 5 minutes before loading in SDS-PAGE  
235 acrylamide gels. Western blots were performed using anti-GFP (Sigma G6795), anti-  
236 Luciferase (Sigma L0159), anti-Mouse IgG-Peroxidase (Sigma A2554), and anti-  
237 Rabbit IgG-Peroxidase (Sigma A0545).

238 MAPK activation assays were performed as previously described (Macho et al,  
239 2012), with minor modifications. Briefly, 7 day-old Arabidopsis seedlings grown on  
240 solid ½ MS were transferred to water and then treated with 100 nM flg22 for 10  
241 minutes after vacuuming 5 minutes (15 minutes in total). Anti-pMAPK [Phospho-  
242 p44/42 MAPK (Erk1/2) (Thr202/Tyr204) XP Rabbit mAb; Cell Signaling 4370] was  
243 dissolved in 3% gelatin (Sigma G7041) and used to hybridize the membranes. All  
244 membranes were stained with Ponceau stain (Sangon Biotech, Shanghai, China) to  
245 verify equal loading.

246

### 247 **ROS burst**

248 ROS burst assays were conducted as previously described (Sang and Macho, 2017).  
249 Briefly, 4 mm leaf discs from 5-6 week-old Arabidopsis plants grown in short day  
250 conditions were transferred to 96-well microplates (PerkinElmer, Waltham, MA, US)  
251 with 100 µl Mili-Q water per well and incubated overnight. Water was then removed  
252 and ROS burst was elicited by adding 100 µl of a solution containing 100 ng flg22,



253 100  $\mu$ M luminol, and 20  $\mu$ g/mL horseradish peroxidase. The luminescence was  
254 recorded over 40 minutes using a Thermo Scientific VARIOSKAN FLASH (Thermo  
255 Fisher Scientific, Waltham, MA, US).

256

#### 257 **Co-IP and large-scale IP for LC-MS/MS**

258 Leaves from 3-4 week-old *N. benthamiana* plants were co-infiltrated with  
259 *Agrobacterium* GV3101 carrying plasmids to express *GFP-IAP1* and *Cluc-IAN9*;  
260 leaves co-infiltrated with GV3101 carrying plasmids to express *GFP-AIP1* and *Cluc*  
261 or *GFP* and *Cluc* were used as controls. Total proteins were extracted 24 hours later,  
262 and immunoprecipitation was performed with GFP-trap beads (Chromotek, Am  
263 Klopferspitz, Planegg-Martinsried, Germany) as described previously (Sang et al,  
264 2016). Proteins were stripped from the beads by boiling in 50  $\mu$ l SDS loading buffer  
265 for 10 mins. Immunoprecipitated proteins were separated on SDS-PAGE acrylamide  
266 gels and western blots were performed as described above. Large-scale  
267 immunoprecipitation assays for LC-MS/MS were performed as described before  
268 (Kadota et al. 2016; Sang et al. 2016), using 5 g of 10 day-old Arabidopsis seedlings  
269 before or after treatment with 100 nM flg22 or 0.5 mM SA.

270

271 **Results**

272

273 **Expression analysis of the *IAN* gene family upon bacterial infection reveals**  
274 **differential expression patterns for *IAN7*, *IAN8*, and *IAN9***

275 The *IAN* protein family in Arabidopsis is composed of 13 members (Liu et al, 2008;  
276 Figure 1A). Phylogenetic analysis of *IAN* amino acid sequences shows a clear  
277 separation in different subgroups (Figure 1A, Figure S1). Previous reports have  
278 described changes in expression of *IAN* gene family members upon different biotic  
279 stimuli (Reuber and Ausubel, 1996; Liu et al, 2008). In order to characterize the  
280 transcriptional response of *IAN* genes to bacterial infection, we inoculated  
281 Arabidopsis seedlings with the virulent pathogen *Pseudomonas syringae* pv. *tomato*  
282 (*Pst*) DC3000. Three *IAN* genes showed differential expression patterns upon  
283 bacterial infection: *IAN7* and *IAN8* showed a significant up-regulation, while *IAN9*  
284 showed a significant down-regulation (Figure 1B). Regarding other *IAN* members, we  
285 did not detect mRNA for *IAN1/2/4/6/10/11/12/13*, suggesting that these genes are not  
286 expressed in 10 day-old Arabidopsis seedlings in our experimental conditions, while  
287 transcript abundance for *IAN3/5* was not influenced by pathogen infection (data not  
288 shown). The pathogen-induced up-regulation of *IAN8* is reminiscent of the originally  
289 reported up-regulation of this gene by bacteria expressing the effector *AvrRpt2*,  
290 which induces activation of the plant NLR RPS2 (Reuber and Ausubel, 1996).  
291 Accordingly, we found that the differential expression of *IAN7/8* and *IAN9* also takes  
292 place upon infection of Arabidopsis rosette leaves with *Pst* expressing *AvrRpt2*  
293 (Figure 1C). The particular expression pattern of *IAN9* among the *IAN* gene family  
294 suggests an exclusive function for *IAN9* rather than functional redundancy with other  
295 *IAN* family members. This idea is supported by the fact that *IAN9* constitutes a  
296 specific phylogenetic group within the *IAN* gene family (Figure 1A). For these  
297 reasons, we decided to focus our attention on *IAN9*.

298

299 ***IAN9* expression is reduced upon chemical activation of plant immunity**

300 *IAN9* is broadly expressed in cotyledons, hypocotyls, and roots of Arabidopsis  
301 seedlings (Figure S2). To dissect the bacteria-induced repression of *IAN9*  
302 transcription, we sought to determine whether perception of purified immune elicitors  
303 affects *IAN9* expression. For this purpose, we first treated Arabidopsis seedlings with  
304 the flagellin-derived peptide flg22, which is widely used as an elicitor of immune  
305 responses. Our results show that *IAN9* expression is significantly reduced one hour  
306 after flg22 treatment (Figure 2A). The perception of different invasion patterns,  
307 including flg22, leads to the production of the phytohormone salicylic acid (SA),

308 which is a key player in the activation of plant immunity against biotrophic pathogens  
309 (Vlot et al., 2009). Treatment with SA for three hours led to a reduction of *IAN9*  
310 expression, although the abundance of *IAN9* transcripts returned to basal levels after  
311 a 6-hour SA treatment (Figure 2B), revealing a transient down-regulation of *IAN9*  
312 transcript abundance upon SA treatment. Finally, to determine whether the reduction  
313 on *IAN9* transcription upon flg22 treatment depends on the downstream SA  
314 accumulation (Tsuda et al., 2008), we performed flg22 treatment in the SA-depleted  
315 *sid2/NahG* plants, deficient in pathogen-induced SA biosynthesis (Wildermuth et al.  
316 2001) and constitutively expressing the bacterial salicylate hydroxylase NahG, which  
317 degrades SA (Delaney et al., 1994). Interestingly, the flg22-triggered down-regulation  
318 of *IAN9* transcript abundance was also observed in *sid2/NahG* plants, suggesting  
319 that SA is not required for the flg22-induced transcriptional repression of *IAN9*.

320

### 321 **IAN9 localizes to the plasma membrane through its C-terminal part**

322 In order to investigate the subcellular localization of IAN9, we generated stable  
323 transgenic Arabidopsis lines expressing an N-terminal GFP-tagged IAN9 protein (see  
324 below for a detailed characterization of these lines), and used confocal microscopy to  
325 determine the localization of GFP-IAN9. Contrary to free GFP, which shows a  
326 nuclear/cytoplasmic localization, GFP-IAN9 specifically localized at the cell periphery  
327 (Figure 3A). This localization was similar to that observed for well-characterized  
328 plasma membrane (PM)-localized proteins, such as the brassinosteroid (BR)  
329 receptor BRI1 (Wang et al., 2001; Figure 3A). To determine whether GFP-IAN9 is  
330 associated to membranes, we used the lipophilic fluorescent dye FM4-64, which is  
331 rapidly incorporated into membranes upon contact with plant cells (Fischer-Parton et  
332 al., 2000; Bolte et al., 2004). Our results show that GFP-IAN9 fluorescence co-  
333 localizes with FM4-64-labeled compartments (Figure 3B and 3C), similar to BRI1-  
334 GFP fluorescence, and different from free GFP (Figure 3B and 3C). To further  
335 confirm that IAN9 localizes at the PM, we performed plasmolysis assays by treating  
336 plant tissues with 1 M NaCl. Upon plasmolysis, both GFP-IAN9 and BRI1-GFP were  
337 detected in Hechtian strands, which are associated to PM retractions from the cell  
338 wall (Figure 3D). Altogether, our microscopy analysis indicates that IAN9 localizes at  
339 the PM in plant cells.

340 The C-terminal domain is not conserved among IAN proteins (Figure S1).  
341 Interestingly, the C-terminal sequence of IAN9 shows an over-representation of  
342 positively charged amino acids (KKLRENLERAEKETKELQKKGKINL; 33.3% of  
343 R/K), not present in other IAN proteins (Figure S1 and S3A), which could mediate an  
344 interaction with the negatively charged phospholipids of the PM. To test this

345 hypothesis, we generated Arabidopsis stable transgenic lines expressing a truncated  
346 GFP-IAN9 version lacking the 27 C-terminal amino acids (IAN9 $\Delta$ C-27). The IAN9 $\Delta$ C-  
347 27 version lost the specific PM localization seen for wild type GFP-IAN9, and was  
348 mostly detected in the cytoplasm (Figure S3B). Additionally, we found that, when  
349 GFP is fused to the C-terminal end of IAN9 (IAN9-GFP), this protein loses its specific  
350 PM localization, and is mostly found in the cytoplasm (Figure S3B). Compared to  
351 IAN9, the IAN8 C-terminal part has a lower representation of positively charged  
352 aminoacids (18.5%; Figure S3A), and we found that a N-terminal GFP-tagged IAN8  
353 (GFP-IAN8) localizes to the cytoplasm. Altogether, these results suggest that the  
354 exclusive C-terminal domain of IAN9 is required for its localization at the PM.

355

### 356 **Generation of *IAN9* knock-out and overexpression lines**

357 Public repositories for Arabidopsis T-DNA insertion lines contain four independent  
358 lines with T-DNA insertions in the *IAN9* genomic locus: *SAIL\_167\_B02*,  
359 *SALK\_534\_B01*, *SALK\_144369*, and *GK-146B08*. For all these lines, the insertion  
360 site is located in the predicted promoter region of *IAN9*. Among them, *GK-146B08* is  
361 the line harboring the nearest T-DNA insertion to the *IAN9* start codon (Figure S4A),  
362 and therefore we chose this line for further analyses. Sequencing analysis results  
363 showed that the insertion site is located 76 bp upstream of the 5'-UTR of the *IAN9*  
364 gene, and 319 bp upstream of the *IAN9* start codon (Figure S4A and S4B). RT-PCR  
365 and RT-qPCR analyses showed that this mutant has approximately a 3-fold  
366 reduction in the amount of *IAN9* transcripts (Figure S4C and S4D), indicating that this  
367 line is a knockdown *ian9* mutant. To further characterize this line, we determined the  
368 *IAN9* transcript levels upon bacterial inoculation. Surprisingly, we found that *IAN9*  
369 transcript levels increased significantly upon inoculation with *Pst* or *Pst* (AvrRpt2),  
370 reaching higher levels than those observed in wild type plants (Figure S4E) and an  
371 opposite regulation (Figure 1). These findings indicate that the T-DNA insertion in the  
372 *IAN9* promoter generates an aberrant expression pattern of *IAN9* in this line,  
373 rendering it unusable for the functional characterization of this gene.

374 In order to perform genetic analysis of the contribution of IAN9 to plant immunity, we  
375 generated *ian9* mutant lines using CRISPR/Cas9-assisted genome editing (Feng et  
376 al, 2013; Mao et al, 2013). We selected the best predicted target site in the *IAN9*  
377 gene sequence for recognition by the Cas9/sgRNA complex (Figure S5), and  
378 performed the targeted mutagenesis as explained in the methods section.  
379 Sequencing of the resulting line showed an addition of 1 base pair in the second  
380 exon of *IAN9*, creating a premature stop codon 366 base pairs downstream of the  
381 start codon (Figure S6A), which generates a truncated protein with a disrupted GTP-

382 binding domain. Upon selection of seedlings containing the *ian9* mutation in  
383 homozygosis, we selected a line for which where the Cas9 gene was segregated out  
384 (Figure S6B); this Cas9-free *ian9* line was used for further experiments. Additionally,  
385 as mentioned before, we generated Arabidopsis transgenic lines overexpressing  
386 *IAN9* in a Col-0 wild type background, using a 35S promoter to express a *GFP-IAN9*  
387 fusion. We selected two independent homozygous lines that accumulated detectable  
388 amounts of GFP-*IAN9* fusion protein (Figure S6C), and higher transcript levels of  
389 *IAN9* compared to those in Col-0 wild type (OE-*GFP-IAN9*#3-10 and OE-*GFP-*  
390 *IAN9*#7-1) (Figure S6D). As controls, we selected two independent homozygous  
391 lines expressing free GFP, which did not show changes in *IAN9* transcription and  
392 accumulated detectable levels of free GFP (Figure S6C and S6D). Interestingly,  
393 although the 35S promoter led to high *IAN9* expression compared to Col-0 wild type,  
394 bacterial infection still caused a reduction in *IAN9* transcript levels (Figure S7),  
395 suggesting a post-transcriptional regulation of the abundance of *IAN9* transcripts.  
396 Overexpression of *IAN9* did not affect *IAN8* expression in basal conditions or upon  
397 bacterial infection (Figure S7).

398

#### 399 **Plant growth and early immune responses are not affected by altered** 400 **expression of *IAN9***

401 Both *IAN9* overexpressing or *ian9* knockout seedlings and adult plants were visually  
402 indistinguishable from the wild type (Figure S8 and S9). Given the predicted  
403 association of the IAN family to immune responses and the alteration in *IAN9*  
404 expression upon elicitation with flg22, we sought to determine whether *IAN9* is  
405 involved in early PTI responses, namely the flg22-triggered burst of reactive oxygen  
406 species (ROS), and the activation of a cascade of mitogen-activated protein kinases  
407 (MAPKs) (Boller & Felix, 2009, Macho & Zipfel, 2014). Our results show that  
408 mutation or overexpression of *IAN9* did not have a detectable impact in the dynamics  
409 or total accumulation of ROS upon flg22 treatment (Figure S8B, S8C and Figure  
410 S10). Similarly, neither mutant nor overexpression (OE) lines showed differences in  
411 flg22-triggered MAPK activation compared to wild type plants or free GFP-expressing  
412 controls (Figure S8D and S8E). Taken together, these results suggest that  
413 alterations of *IAN9* expression do not affect early PTI responses.

414

#### 415 ***IAN9* negatively regulates plant immunity against *Pst* DC3000**

416 To test whether *IAN9* contributes to plant immunity against bacterial pathogens, we  
417 performed surface inoculation of the *ian9* mutant line with *Pst* DC3000 and  
418 determined bacterial replication in plant tissues. Our results show that knockout

419 mutation of *IAN9* increased plant resistance against *Pst* DC3000, causing a 13-fold  
420 reduction on bacterial titers (Figure 4A). In order to test whether the increase in  
421 resistance also occurs in a context of ETI, we syringe-infiltrated Arabidopsis rosette  
422 leaves with *Pst* (AvrRpt2). However, no differences were detected in terms of  
423 replication of this strain (Figure 4B). To confirm that the observed increased  
424 resistance to *Pst* DC3000 is really due to the absence of *ian9*, we generated  
425 complementation lines expressing *GFP-IAN9*, driven by a 35S promoter, in the *ian9*  
426 knockout mutant background, where the GFP-*IAN9* protein accumulated and  
427 localized to the PM (Figure S11A and S11B). Expression of GFP-*IAN9* in the *ian9*  
428 background was able to rescue the level of growth of *Pst* DC3000 to that observed in  
429 wild type plants (Figure S11C), confirming the association of *IAN9* with the observed  
430 increased resistance. Interestingly, transgenic lines overexpressing GFP-*IAN9* in a  
431 wild type background showed a tendency to support higher bacterial loads compared  
432 to wild type or GFP-expressing lines, suggesting that *IAN9* overexpression  
433 suppresses plant immunity against *Pst* DC3000, although such tendency was not  
434 always reproducible or statistically significant across eight independent biological  
435 repeats (Figure S12).

436

#### 437 **Identification of *IAN9*-interacting proteins**

438 To characterize further the mode of action of *IAN9*, we searched for proteins  
439 physically associated with *IAN9* in plant cells using Arabidopsis seedlings expressing  
440 *GFP-IAN9* (line OE-*GFP-IAN9*#3-10) and seedlings expressing free GFP as control.  
441 Upon GFP immunoprecipitation (IP) using agarose beads coupled to an anti-GFP  
442 nanobody (GFP-Trap beads), we detected associated proteins using liquid  
443 chromatography coupled to tandem mass-spectrometry (LC-MS/MS). In order to  
444 detect potential dynamic interactions, we additionally treated seedlings for one hour  
445 with flg22 or SA before immunoprecipitation. Two independent biological replicates  
446 showed a large number of proteins physically associated with *IAN9*, which we filtered  
447 using the following criteria: 1. Presence in both biological replicates; 2. Detection of  
448 two or more exclusive unique peptides; 3. Absence in the GFP control. After applying  
449 these filters, a total of 14 proteins were identified as *IAN9* candidate interactors  
450 (Table S1).

451

452 Among these candidate interactors, we drew our attention to an uncharacterized  
453 protein encoded by the AT1G18660 gene (Table S1), which we named IAP1 for  
454 *IAN9*-ASSOCIATED PROTEIN1. Interestingly, IAP1 associated with *IAN9* in both  
455 replicates of IP + LC-MS/MS, but the number of detected IAP1 peptides decreased in



456 samples treated with SA, while it did not change significantly in samples treated with  
457 flg22 (Table S1). Domain analysis predicts the presence of three tetratricopeptide-  
458 like helical (TPR) domains, a C3HC4-type RING finger domain, and an ATP-  
459 dependent protease La (LON) domain in this protein (Figure S13A). Upon  
460 *Agrobacterium*-mediated transient expression in *Nicotiana benthamiana*, a GFP-IAP1  
461 fusion protein localized at the cell periphery, nucleus (weakly), and around the  
462 nucleus; the latter most likely corresponds to the usual endoplasmic reticulum  
463 localization of PM-localized proteins overexpressed in this system (Figure S13B and  
464 S13C). Co-expression with RFP-IAN9 showed that both proteins co-localize upon  
465 transient expression (Figure 5A). To confirm the interaction between IAN9 and IAP1,  
466 we performed a targeted co-IP using GFP-IAP1 and a N-terminal fusion of IAN9 to  
467 the C-terminal domain of luciferase (Cluc-IAN9). Co-IP assays show that GFP-IAP1  
468 interacts with Cluc-IAN9, but not with Cluc alone (Figure 5B); Cluc-IAN9 does not  
469 interact with free GFP (Figure S14). To determine whether the IAN9-IAP1 interaction  
470 is direct, we performed a luciferase complementation assay, transiently co-  
471 expressing Cluc-IAN9 and IAP1 fused to the N-terminal domain of luciferase (IAP1-  
472 Nluc). A positive control co-expressing AtSGT1b-Nluc and Cluc-AtRAR1 showed a  
473 strong luciferase signal (Figure S15A), as described before (Chen et al., 2008). On  
474 the contrary, tissues co-expressing Cluc-IAN9 and Nluc-IAP1 did not show any  
475 detectable luciferase signal (Figure S15A), although both proteins accumulated  
476 (Figure S15B). As an alternative technique to detect direct interactions, we employed  
477 FRET-FLIM by co-expressing GFP-IAP1 and RFP-IAN9. However, no difference in  
478 GFP fluorescence lifetime was detected when compared to control samples (Figure  
479 S15C). Although an influence of the tags cannot be ruled out, these results suggest  
480 that the interaction observed for IAP1 and IAN9 is most likely indirect.

481

#### 482 **IAP1 negatively regulates plant immunity against *Pst* DC3000**

483 Public repositories for Arabidopsis T-DNA insertion lines contain two independent  
484 lines with T-DNA insertions in the *IAP1* genomic locus: *SALK\_119114* and  
485 *SALK\_093498* (Figure S16A). We isolated homozygous lines containing these  
486 insertions (Figure S16B) and confirmed the absence of *IAP1* transcripts (Figure  
487 S16C), naming these lines *iap1-1* and *iap1-2*, respectively (Figure S16A). Both lines  
488 displayed wild-type-like growth and development when grown on soil under short-day  
489 conditions (Figure 6A), although mutant seedlings showed a slightly reduced root  
490 length compared to Col-0 wild type when grown in vertical MS plates (Figure S17).  
491 To determine whether mutations in *IAP1* have an impact on plant resistance against  
492 bacterial pathogens, we performed surface inoculation of the *iap1* mutant lines with

493 *Pst* DC3000. Our results show that both *iap1-1* and *iap1-2* mutant lines are more  
494 resistant than Col-0 wild type against *Pst* DC3000, showing a 19-fold reduction on  
495 bacterial loads (Figure 6B). However, none of these lines showed differences after  
496 inoculation with *Pst* expressing AvrRpt2 (Figure 6C). Interestingly, these results  
497 resemble those obtained during the characterization of the *ian9* knockout mutant line  
498 (Figure 4), suggesting that both proteins are involved in the negative regulation of  
499 basal immunity against bacterial pathogens, and may act in the same pathway  
500 through physical association.  
501



502 **Discussion**

503

504 In this work, we characterized the transcription patterns of *IAN* family members in  
505 *Arabidopsis* upon infection with the bacterial pathogen *Pto DC3000*. *IAN7* and *IAN8*,  
506 which seem to form a separate phylogenetic subgroup, are up-regulated upon  
507 bacterial infection. On the contrary, *IAN9* seems to form a specific subgroup and  
508 shows a unique down-regulation upon bacterial infection. Infection with a virulent  
509 bacterial pathogen, such as *Pto DC3000*, triggers changes in plant cells caused by  
510 bacterial virulence activities (e.g. alteration of plant processes by T3Es) and basal  
511 immune responses. Therefore, formally, transcriptional changes upon infection could  
512 be associated with bacterial virulence or plant immunity. In this case, the down-  
513 regulation of *IAN9* expression upon bacterial infection seems associated with the  
514 activation of immunity, since we detected similar expression patterns upon treatment  
515 with elicitors of immunity, namely flg22 and SA. Interestingly, we detected a  
516 reduction in the amount of *IAN9* transcripts after bacterial infection even in transgenic  
517 lines where *IAN9* overexpression is driven by a constitutive 35S promoter,  
518 suggesting a post-transcriptional regulation of *IAN9* transcript abundance. Although  
519 the perception of flg22 leads to the production of SA (Tsuda et al., 2008), our data  
520 show that the flg22-triggered reduction of *IAN9* transcription takes place in  
521 *sid2/NahG* plants, indicating that this transcriptional change is independent of the  
522 observed SA-triggered reduction of *IAN9* transcription. SA-deficient mutants are  
523 partially affected in flg22-triggered induction of defence-related genes, probably  
524 caused by lower levels of the flg22 receptor FLS2 (Yi et al., 2014). Our results  
525 indicate that these lower levels of FLS2 in *sid2/NahG* plants are nevertheless  
526 sufficient to trigger the *IAN9* transcriptional repression, suggesting that *IAN9*  
527 transcription may be highly sensitive to external biotic stimuli.

528

529 Besides showing different expression patterns, the subcellular localization of *IAN9*  
530 (mostly at the PM) is also different from that of *IAN8* (mostly in the cytoplasm). This  
531 differential localization further suggests distinct functions for these two *IAN* family  
532 members. The C-terminal domain of *IAN9*, required for PM localization, is not  
533 present in other *IAN* proteins. This could indicate that the *IAN9* mechanism for PM  
534 attachment is exclusive within the *IAN* family, although other *IAN* proteins could  
535 localize at the PM through different means.

536

537 Mutation of *IAN9* causes increased resistance to *Pto DC3000*, and this phenotype is  
538 rescued in complementation lines. It is worth considering the possibility that *IAN9* is

539 guarded by NLRs as it has been shown for some regulators of immunity (Khan et al,  
540 2016), therefore explaining the increased resistance in the *ian9* knockout mutant.  
541 However, the absence of developmental phenotypes or constitutive immune  
542 responses makes this possibility unlikely. Additionally, overexpression lines show a  
543 tendency for increased susceptibility, although this phenotype was not always  
544 significant or reproducible. The lack of robustness in this phenotype could suggest  
545 that *IAN9* transcript abundance is not rate limiting; however, it could also be due to  
546 the potential post-transcriptional regulation of *IAN9* transcript abundance that we  
547 have seen in the *IAN9* overexpression lines, which show a reduction in the amount of  
548 *IAN9* transcripts after bacterial infection. The transient nature of *IAN9* transcriptional  
549 repression upon SA treatment, returning to basal levels after 6 hours, may indicate  
550 that the negative regulation exerted by *IAN9* could be required to contribute to the  
551 repression of immune responses after immunity has been established.

552

553 Using IP followed by LC-MS/MS, we found IAP1 as a protein associated with *IAN9*.  
554 IAP1 contains three tetratricopeptide-like helical (TPR) domains, a C3HC4-type  
555 RING finger domain, and an ATP-dependent protease La (LON) domain. Upon  
556 transient expression, IAP1 co-localizes with *IAN9* in *N. benthamiana* cells. Genetic  
557 analysis indicates that both *IAN9* and IAP1 negatively regulate immunity against *Pto*  
558 DC3000. Given their physical association, it is possible that both proteins belong to a  
559 protein complex involved in the negative regulation of basal immunity against  
560 bacterial pathogens. Although we confirmed the association between *IAN9* and IAP1  
561 using targeted IP, we failed to detect a direct physical interaction using luciferase  
562 complementation or FRET-FLIM assays. Specific limitations of interaction techniques  
563 may be hindering the detection of a direct interaction; however, these data may also  
564 indicate that the interaction between *IAN9* and IAP1 is indirect, perhaps mediated by  
565 other scaffolding components in the same protein complex. The Arabidopsis  
566 Interactome Database ([http://interactome.dfc.harvard.edu/A\\_thaliana/index.php](http://interactome.dfc.harvard.edu/A_thaliana/index.php)) has  
567 reported several interactors for IAP1 in Y2H assays (Table S2). Interestingly, several  
568 of these interacting proteins are transcription factors, and others have predicted  
569 nuclear localization or undergo nucleo-cytoplasmic re-localization associated to their  
570 activity (Table S2). Considering that IAP1 interacts with several proteins with nuclear  
571 activities, it is tempting to speculate that the *IAN9*/IAP1 complex could associate with  
572 transcriptional regulators in the absence of biotic stress, acting as negative  
573 regulators of immune responses, and the complex may dissociate upon pathogen  
574 infection to allow for the activation of executor immune responses that restrict  
575 pathogen proliferation. This hypothetical model is in agreement with the observation

576 that IAN9 does not seem to regulate early elicitor-induced responses (namely flg22-  
577 triggered ROS burst and MAPK activation). Given that *ian9* or *iap1* mutants do not  
578 show auto-immunity phenotypes, the final activation of immune responses may  
579 require additional activation by other immune regulators, of which the activity could  
580 be facilitated by the absence of IAN9 or IAP1.

581

582 Altogether, our results reveal IAN9 and IAP1 as suitable targets for biotechnological  
583 approaches to generate crops with increased disease resistance to bacterial  
584 pathogens, since both IAN9 and IAP1 have orthologs in agriculturally important crop  
585 species (Figure S18 and S19). Current regulations hinder the use of transgenic  
586 plants to generate disease-resistant crops. Alternative strategies consider the  
587 mutation of negative regulators of immunity, although this often leads to fitness costs  
588 or auto-immunity phenotypes, which obstruct their applicability in agriculture.  
589 Interestingly, IAN9 and IAP1 behave as negative regulators of basal immunity, since  
590 *ian9* and *iap1* knockout plants show increased resistance to bacterial infection, but  
591 they do not show obvious differences compared to wild-type plants in terms of size or  
592 development. Our *IAN9* mutagenesis approach shows that it is feasible to design  
593 CRISPR/Cas9-mediated strategies to obtain stable non-transgenic mutant plants  
594 with increased resistance to pathogens and no obvious developmental defects,  
595 paving the way to a potential application in breeding for disease resistance.

596

597 **Acknowledgements**

598 We thank members of the Macho and Lozano-Durán laboratories for helpful  
599 discussions; Jianming Li, Jian-Min Zhou and Jian-Kang Zhu for sharing biological  
600 materials; and Xinyu Jian for technical and administrative assistance during this  
601 work. We thank the PSC Cell Biology core facility for assistance with confocal  
602 microscopy, and the PSC Proteomics core facility for LC-MS/MS analysis. This work  
603 was supported by the Shanghai Center for Plant Stress Biology (Chinese Academy  
604 of Sciences). Research in the Macho laboratory is also supported by the National  
605 Natural Science Foundation of China (NSFC; grant 31571973) and the Chinese 1000  
606 Talents Program. Research in the Lozano-Durán laboratory is also supported by the  
607 National Natural Science Foundation of China (NSFC; grant 31671994) and the 100  
608 Talents Program from the Chinese Academy of Sciences. CCM is sponsored by a  
609 CAS-TWAS President's Fellowship for International PhD Students. TR-D is the  
610 recipient of a President's International Fellowship Initiative (PIFI) postdoctoral  
611 fellowship (No. 2016PB042) from the Chinese Academy of Sciences. The authors  
612 have no conflict of interest to declare.  
613

614 **Supplementary data**

615

616 **Figure S1. Alignment of IAN proteins.**

617 **Figure S2. Expression of *IAN9* in *Arabidopsis* seedlings.**

618 **Figure S3. The C-terminal region of *IAN9* is important for its PM localization.**

619 **Figure S4. Characterization of the GK-146B08 line with an insertion in the**  
620 **promoter of *IAN9*.**

621 **Figure S5. Exact mutation site in the *ian9* mutant generated by CRISPR/Cas9.**

622 **Figure S6. Characterization of the *ian9* mutant and *IAN9* over-expression lines.**

623 **Figure S7. Transcription of *IAN8* is not affected by over-expression of *IAN9*.**

624 **Figure S8. Plant growth and early immune responses are not affected by**  
625 **altered expression of *IAN9*.** **Figure S9. Seedlings of the *ian9* mutant and *IAN9***  
626 **over-expression do not show developmental defects.**

627 **Figure S10. Flg22-triggered ROS dynamics are not affected by alterations in**  
628 ***IAN9* expression.**

629 **Figure S11. Analysis of the *ian9/35S::GFP-IAN9* complementation line.**

630 **Figure S12. Transgenic lines overexpressing GFP-*IAN9* in a wild type**  
631 **background show a tendency to support higher bacterial loads compared to**  
632 **wild type or GFP-expressing lines.**

633 **Figure S13. Characterization of *IAP1*.**

634 **Figure S14. Cluc-*IAN9* associates with GFP-*IAP1* but not with free GFP in *N.***  
635 ***benthamiana* leaves.**

636 **Figure S15. *IAN9* and *IAP1* do not interact directly in *N. benthamiana* leaves.**

637 **Figure S16. Characterization of the *iap1* mutant alleles.**

638 **Figure S17. Seedlings of the *iap1* mutant lines show slightly reduced root**  
639 **elongation.**

640 **Figure S18. *IAN9* orthologs in different plant species.**

641 **Figure S19. *IAP1* orthologs in different plant species.**

642

643 **Table S1. Proteins associated to GFP-*IAN9* identified after affinity purification**  
644 **followed by LC-MS/MS analysis.**

645 **Table S2. *IAP1* interactors according to the Arabidopsis Interactome Database.**

646 **Table S3. List of primers used in this study**

647

648 **Methods S1**

649

650 **Figure Legends**

651

652 **Figure 1. Transcription patterns of the *IAN* gene family in *Arabidopsis*.**

653 (A) Phylogenetic tree of *IAN* proteins. (B and C) Relative expression of *IAN7*, *IAN8*  
654 and *IAN9* in 9-10 days-old *Arabidopsis* seedlings, 6 hours after inoculation with *Pst*  
655 DC3000 (B) or *Pst* DC3000 (*AvrRpt2*) (C). Real-time quantitative PCR results were  
656 normalized with *UBIQUITIN 10* (*UBQ10*, AT4G05320). Values are means  $\pm$  SEM  
657 (n=3). Statistical differences were calculated using one-way ANOVA ( $p < 0.01$ ). Each  
658 experiment was performed three times with similar results.

659

660 **Figure 2. Treatment with flg22 or salicylic acid causes a reduction on the**  
661 **transcription of *IAN9*.**

662 Relative expression of *IAN9* in 9-10 days-old *Arabidopsis* seedlings. Seedlings in (A)  
663 and (C) were treated with 100 nM flg22 for 1 hour. Seedlings in (B) were treated with  
664 0.5 mM salicylic acid for 3 or 6 hours. Real-time quantitative PCR results were  
665 normalized with *UBIQUITIN 10* (*UBQ10*, AT4G05320). Values are means  $\pm$  SEM  
666 (n=3). Statistical differences were calculated using one-way ANOVA ( $p < 0.01$ ). Each  
667 experiment were performed three times with similar results.

668

669 **Figure 3. GFP-*IAN9* localizes to the plasma membrane in *Arabidopsis***

670 (A) Confocal images of GFP, GFP-*IAN9*, and BRI1-GFP in *Arabidopsis* cotyledon  
671 epidermal cells. Bar=10  $\mu$ m. (B) Confocal images of GFP, GFP-*IAN9*, and BRI1-GFP  
672 in *Arabidopsis* cotyledon epidermal cells. *Arabidopsis* seedlings were treated FM4-64  
673 for 5 minutes before confocal imaging, and the FM4-64 signal is shown in red. Bar=5  
674  $\mu$ m. (C) Fluorescence intensity through the thin lines shown in (B). (D) Confocal  
675 images of GFP, GFP-*IAN9*, and BRI1-GFP in *Arabidopsis* cotyledon epidermal cells  
676 after plasmolysis (5-minute treatment with 1M NaCl). Red arrows indicate the  
677 presence of Hectian strands. Bar=10  $\mu$ m.

678

679 **Figure 4. *IAN9* negatively regulates plant immunity against *Pst* DC3000.**

680 (A) Growth of surface (spray)-inoculated *Pto* DC3000 ( $OD_{600}=0.1$ ) in wild-type (WT)  
681 Col-0 and *ian9* mutant plants, 3 days post-inoculation (dpi). Experiments repeated  
682 more than three times with similar results. (B) Growth of *Pto* DC3000 (*AvrRpt2*)  
683 ( $OD_{600}=0.001$ ) infiltrated with a needleless syringe into wild-type (WT) Col-0 and *ian9*  
684 mutant plants, 3 days post-inoculation (dpi). Experiments performed twice with  
685 similar results. (A and B) Data were represented as means  $\pm$  SE (n=8). Statistical

686 differences were calculated using a Student's t-test. "ns" indicates no significant  
687 difference, and asterisk indicated significant difference ( $p < 0.05$ ).

688

689 **Figure 5. IAP1 interacts with IAN9 in *N. benthamiana* leaves.**

690 (A) Confocal microscopy images showing the co-localization of GFP-IAP1 and RFP-  
691 IAN9 in *N. benthamiana* leaves. Bar=10  $\mu\text{m}$ . (B) Cluc or Cluc-IAN9 was co-  
692 expressed with GFP-IAP1 in *N. benthamiana* before immunoprecipitation using GFP-  
693 trap beads. Immunoblots were analysed using anti-luc or anti-GFP antibody.  
694 Molecular weight (kDa) marker bands are indicated for reference. The experiments  
695 were repeated three with similar results.

696

697 **Figure 6. IAP1 negatively regulates plant immunity against *Pst* DC3000.**

698 (A) Photography of four week-old Col-0 wild type (WT), *iap1-1*, and *iap1-2* plants,  
699 grown at a 8 h light/16 h dark photoperiod. Scare bar is 0.5 cm. (B) Growth of surface  
700 (spray)-inoculated *Pto* DC3000 ( $\text{OD}_{600}=0.1$ ) in wild-type (WT) Col-0, *iap1-1*, and *iap1-2*  
701 mutant plants, 3 days post-inoculation (dpi). Experiments repeated more than three  
702 times with similar results. (C) Growth of *Pto* DC3000 (AvrRpt2) ( $\text{OD}_{600}=0.001$ )  
703 infiltrated with a needleless syringe into wild-type (WT) Col-0, *iap1-1*, and *iap1-2*  
704 mutant plants, 3 days post-inoculation (dpi). Experiments performed twice with  
705 similar results. (B and C) Data were represented as means  $\pm$  SE ( $n=8$ ). Statistical  
706 differences were calculated using a Student's t-test. "ns" indicates no significant  
707 difference, and asterisk indicated significant difference ( $p < 0.05$ ).

708

709

710

711

712

713

714

715 **Bibliography**

716

717 Beck M, Zhou J, Faulkner C, MacLean D, Robatzek S. 2012. Spatio-temporal cellular  
718 dynamics of the Arabidopsis flagellin receptor reveal activation status-dependent  
719 endosomal sorting. *Plant Cell* 24: 4205-4219.

720

721 Bigeard J, Colcombet J, Hirt H. 2015. Signaling mechanisms in pattern-triggered  
722 immunity (PTI). *Mol Plant* 8: 521-539.

723

724 Boller T, Felix G. 2009. A Renaissance of Elicitors: Perception of Microbe-Associated  
725 Molecular Patterns and Danger Signals by Pattern-Recognition Receptors. *Annu Rev*  
726 *Plant Biol* 60: 379-406.

727

728 Bolte S, Talbot C, Boutte Y, Catrice O, Read ND, Satiat-Jeunemaitre B. 2004. FM-  
729 dyes as experimental probes for dissecting vesicle trafficking in living plant cells. *J*  
730 *Microsc* 214: 159-173.

731

732 Bourne HR, Sanders DA, McCormick F. 1991. The GTPase superfamily: conserved  
733 structure and molecular mechanism. *Nature* 349: 117-127.

734

735 Campos ML, Yoshida Y, Major IT, de Oliveira Ferreira D, Weraduwage SM,  
736 Froehlich JE, Johnson BF, Kramer DM, Jander G, Sharkey TD and Howe GA.  
737 (2016). Rewiring of jasmonate and phytochrome B signalling uncouples plant growth-  
738 defense tradeoffs. *Nature Comms*, 7, 12570.

739

740 Chen H, Zou Y, Shang Y, Lin H, Wang Y, Cai R, Tang X, Zhou JM. 2008. Firefly  
741 luciferase complementation imaging assay for protein-protein interactions in plants.  
742 *Plant Physiol* 146: 368-376.

743

744 Chiang YH, Coaker G. 2015. Effector Triggered Immunity: NLR Immune Perception  
745 and Downstream Defense Responses. *The Arabidopsis Book*. American Society of  
746 Plant Biologists, 13: e0183.

747

748 Clough SJ, Bent AF. 1998. Floral dip: a simplified method for Agrobacterium-  
749 mediated transformation of Arabidopsis thaliana. *Plant J* 16: 735-743.

750



- 751 Cook DE, Mesarich CH, Thomma BPHJ. 2015. Understanding Plant Immunity as a  
752 Surveillance System to Detect Invasion. *Annual Review of Phytopathology*, Vol 53:  
753 541-563.  
754
- 755 Couto D, Zipfel C. 2016. Regulation of pattern recognition receptor signalling in  
756 plants. *Nat Rev Immunol* 16: 537-552.  
757
- 758 de Wit M, Spoel SH, Sanchez-Perez GF, Gommers CMM, Pieterse CMJ, Voeselek  
759 LACJ, Pierik R. 2013. Perception of low red:far-red ratio compromises both salicylic  
760 acid- and jasmonic acid-dependent pathogen defences in *Arabidopsis*. *Plant J* 75:  
761 90-103.  
762
- 763 Delaney TP, Uknes S, Vernooij B, Friedrich L, Weymann K, Negrotto D, Gaffney T,  
764 Gut-Rella M, Kessmann H, Ward E, et al. 1994. A central role of salicylic Acid in  
765 plant disease resistance. *Science* 266: 1247-1250.  
766
- 767 Feng Z, Zhang B, Ding W, Liu X, Yang DL, Wei P, Cao F, Zhu S, Zhang F, Mao Y, et  
768 al. 2013. Efficient genome editing in plants using a CRISPR/Cas system. *Cell Res*  
769 23: 1229-1232.  
770
- 771 Fischer-Parton S, Parton RM, Hickey PC, Dijksterhuis J, Atkinson HA, Read ND.  
772 2000. Confocal microscopy of FM4-64 as a tool for analysing endocytosis and  
773 vesicle trafficking in living fungal hyphae. *J Microsc* 198: 246-259.  
774
- 775 Huot B, Yao J, Montgomery BL, He SY. 2014. Growth-defense tradeoffs in plants: a  
776 balancing act to optimize fitness. *Mol Plant* 7: 1267-1287.  
777
- 778 Kadota Y, Macho AP, Zipfel C. 2016. Immunoprecipitation of Plasma Membrane  
779 Receptor-Like Kinases for Identification of Phosphorylation Sites and Associated  
780 Proteins. *Methods Mol Biol* 1363: 133-144.  
781
- 782 Khan M, Subramaniam R, Desveaux D. 2016. Of guards, decoys, baits and traps:  
783 pathogen perception in plants by type III effector sensors. *Curr Opin Microbiol* 29: 49-  
784 55.  
785

- 786 Liu C, Wang T, Zhang W, Li X. 2008. Computational identification and analysis of  
787 immune-associated nucleotide gene family in *Arabidopsis thaliana*. *J Plant Physiol*  
788 165: 777-787.
- 789
- 790 Macho AP. 2016. Subversion of plant cellular functions by bacterial type-III effectors:  
791 beyond suppression of immunity. *New Phytol* 210: 51-57.
- 792
- 793 Macho AP, Boutrot F, Rathjen JP, Zipfel C. 2012. Aspartate oxidase plays an  
794 important role in *Arabidopsis* stomatal immunity. *Plant Physiol* 159: 1845-1856.
- 795
- 796 Macho AP, Zipfel C. 2014. Plant PRRs and the activation of innate immune signaling.  
797 *Mol Cell* 54: 263-272.
- 798
- 799 Macho AP, Zipfel C. 2015. Targeting of plant pattern recognition receptor-triggered  
800 immunity by bacterial type-III secretion system effectors. *Curr Opin Microbiol* 23: 14-  
801 22.
- 802
- 803 Mao Y, Zhang H, Xu N, Zhang B, Gou F, Zhu JK. 2013. Application of the CRISPR-  
804 Cas system for efficient genome engineering in plants. *Mol Plant* 6: 2008-2011.
- 805
- 806 Nakagawa T, Kurose T, Hino T, Tanaka K, Kawamukai M, Niwa Y, Toyooka K,  
807 Matsuoka K, Jinbo T, Kimura T. 2007. Development of series of gateway binary  
808 vectors, pGWBs, for realizing efficient construction of fusion genes for plant  
809 transformation. *J Biosci Bioeng* 104: 34-41.
- 810
- 811 Nitta T, Nasreen M, Seike T, Goji A, Ohigashi I, Miyazaki T, Ohta T, Kanno M,  
812 Takahama Y. 2006. IAN family critically regulates survival and development of T  
813 lymphocytes. *PLoS Biol* 4: e103.
- 814
- 815 Nitta T, Takahama Y. 2007. The lymphocyte guard-IANs: regulation of lymphocyte  
816 survival by IAN/GIMAP family proteins. *Trends Immunol* 28: 58-65.
- 817
- 818 Reuber TL, Ausubel FM. 1996. Isolation of *Arabidopsis* genes that differentiate  
819 between resistance responses mediated by the RPS2 and RPM1 disease resistance  
820 genes. *Plant Cell* 8: 241-249.
- 821

- 822 Sang Y, Macho AP. 2017. Analysis of PAMP-Triggered ROS Burst in Plant Immunity.  
823 *Methods Mol Biol* 1578: 143-153.  
824
- 825 Sang Y, Wang Y, Ni H, Cazale AC, She YM, Peeters N, Macho AP. 2016. The  
826 *Ralstonia solanacearum* type III effector RipAY targets plant redox regulators to  
827 suppress immune responses. *Mol Plant Pathol*.  
828
- 829 Scheres B, van der Putten WH. 2017. The plant perceptron connects environment to  
830 development. *Nature* 543: 337-345.  
831
- 832 Stael S, Kmieciak P, Willems P, Van Der Kelen K, Coll NS, Teige M, Van Breusegem  
833 F. 2015. Plant innate immunity--sunny side up? *Trends Plant Sci* 20: 3-11.  
834
- 835 Takai Y, Sasaki T, Matozaki T. 2001. Small GTP-binding proteins. *Physiol Rev* 81:  
836 153-208.  
837
- 838 Tsuda K, Glazebrook J, Katagiri F. 2008. The interplay between MAMP and SA  
839 signaling. *Plant Signal Behav* 3: 359-361.  
840
- 841 Vernoud V, Horton AC, Yang Z, Nielsen E. 2003. Analysis of the small GTPase gene  
842 superfamily of Arabidopsis. *Plant Physiol* 131: 1191-1208.  
843
- 844 Vlot AC, Dempsey DA, Klessig DF. 2009. Salicylic Acid, a multifaceted hormone to  
845 combat disease. *Annu Rev Phytopathol* 47: 177-206.  
846
- 847 Wang ZY, Seto H, Fujioka S, Yoshida S, Chory J. 2001. BRI1 is a critical component  
848 of a plasma-membrane receptor for plant steroids. *Nature* 410: 380-383.  
849
- 850 Weiss Y, Foret S, Hayward DC, Ainsworth T, King R, Ball EE, Miller DJ. 2013. The  
851 acute transcriptional response of the coral *Acropora millepora* to immune challenge:  
852 expression of GiMAP/IAN genes links the innate immune responses of corals with  
853 those of mammals and plants. *BMC Genomics* 14: 400.  
854
- 855 Wildermuth MC, Dewdney J, Wu G, Ausubel FM. 2001. Isochorismate synthase is  
856 required to synthesize salicylic acid for plant defence. *Nature* 414: 562-565.  
857

858 Win J, Chaparro-Garcia A, Belhaj K, Saunders DG, Yoshida K, Dong S, Schornack  
859 S, Zipfel C, Robatzek S, Hogenhout SA, et al. 2012. Effector biology of plant-  
860 associated organisms: concepts and perspectives. *Cold Spring Harb Symp Quant*  
861 *Biol* 77: 235-247.

862

863 Yi SY, Shirasu K, Moon JS, Lee SG, Kwon SY. 2014. The activated SA and JA  
864 signaling pathways have an influence on flg22-triggered oxidative burst and callose  
865 deposition. *PLoS One* 9: e88951.

866

867 Zipfel C. 2014. Plant pattern-recognition receptors. *Trends Immunol* 35: 345-351.

868

869

Figure 1

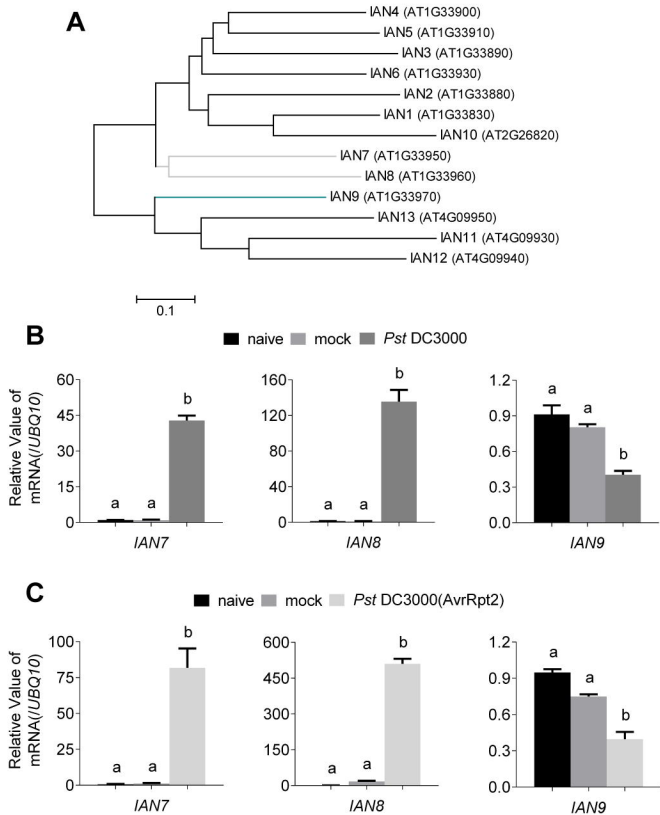

Figure 2

**A**

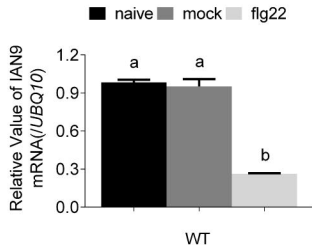

**B**

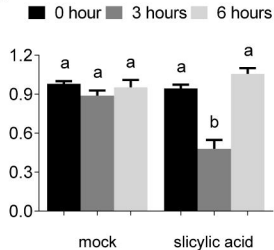

**C**

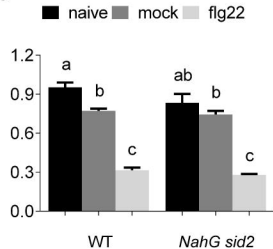

Figure 3

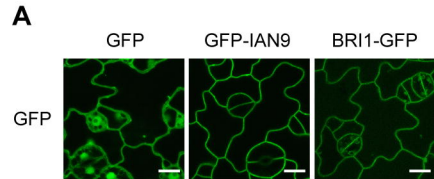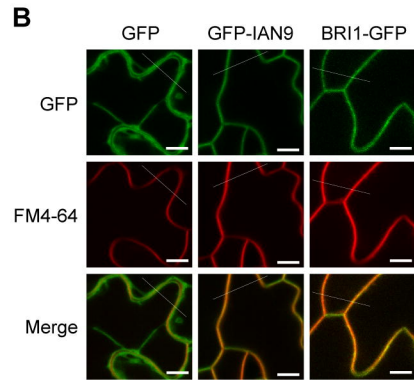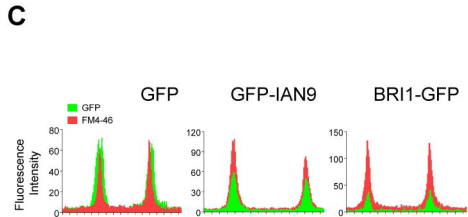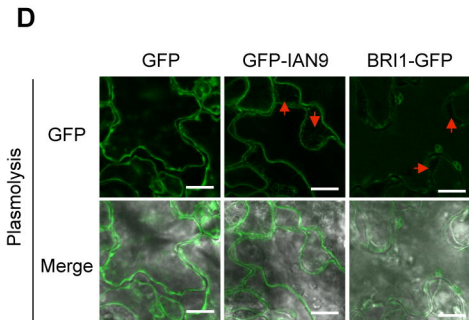

Figure 4

**A**

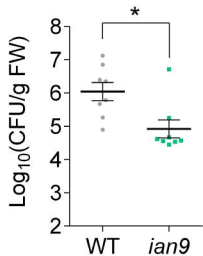

**B**

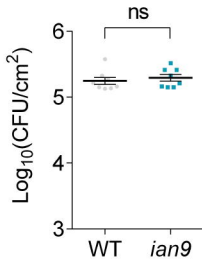



Figure 5

**A**

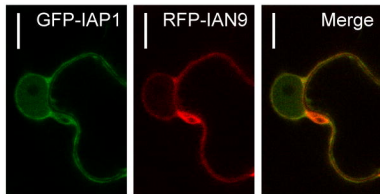

**B**

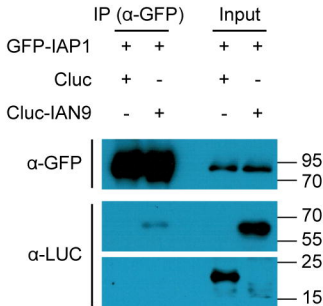

Figure 6

**A**

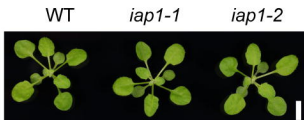

**B**

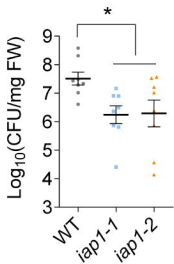

**C**

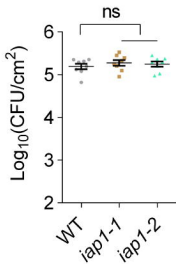

Source: https://www.biorxiv.org/content/10.1101/277269v2.full.pdf
